# Supplementary material
Source: publisher figshare collection journal article supplement (https://sage.figshare.com/ndownloader/files/16705283)
Supplement: Supplementary file 1 [file 16705283]

Supplemental Table S1. Results from adjusted and unadjusted GEE models

| <i>Adjusted for overweight status, age, socioeconomic status, race</i>                |                                |                                |                                |                                |                              |              |
|---------------------------------------------------------------------------------------|--------------------------------|--------------------------------|--------------------------------|--------------------------------|------------------------------|--------------|
| <b>Gender</b>                                                                         | <b>Wave 1</b><br><i>M (SE)</i> | <b>Wave 2</b><br><i>M (SE)</i> | <b>Wave 3</b><br><i>M (SE)</i> | <b>Wave 4</b><br><i>M (SE)</i> | <b>Standardized Estimate</b> | <b>ProbZ</b> |
| Female                                                                                | 29.25 (0.41)                   | 29.59 (0.38)                   | 29.86 (0.41)                   | 29.38 (0.37)                   | -0.001                       | 0.94         |
| Male                                                                                  | 24.09 (0.50)                   | 25.64 (0.463)                  | 24.42 (0.47)                   | 23.84 (0.45)                   | -0.005                       | 0.82         |
| <i>Unadjusted for Overweight Status; adjusted for age, socioeconomic status, race</i> |                                |                                |                                |                                |                              |              |
| <b>Gender</b>                                                                         | <b>Wave 1</b><br><i>M (SE)</i> | <b>Wave 2</b><br><i>M (SE)</i> | <b>Wave 3</b><br><i>M (SE)</i> | <b>Wave 4</b><br><i>M (SE)</i> | <b>Estimate</b>              | <b>ProbZ</b> |
| Female                                                                                | 28.37 (0.46)                   | 28.56 (0.40)                   | 30.21 (0.45)                   | 30.17 (0.39)                   | 0.08                         | <.001        |
| Male                                                                                  | 22.93 (0.51)                   | 24.36 (0.49)                   | 25.07 (0.47)                   | 25.43 (0.45)                   | 0.09                         | <.001        |
| <i>Overweight prevalence at each wave</i>                                             |                                |                                |                                |                                |                              |              |
| <b>Gender</b>                                                                         | <b>Wave 1</b><br><i>N (%)</i>  | <b>Wave 2</b><br><i>N (%)</i>  | <b>Wave 3</b><br><i>N (%)</i>  | <b>Wave 4</b><br><i>N (%)</i>  |                              |              |
| Female                                                                                | 179 (24.8%)                    | 209 (28.2%)                    | 311 (44.8%)                    | 377 (59.4%)                    |                              |              |
| Male                                                                                  | 142 (26.7%)                    | 130 (24.7%)                    | 293 (53.5%)                    | 375 (65.0%)                    |                              |              |

Supplemental Table S2. Posterior probabilities of being assigned to each group

---

*Adjusted for overweight status, age, socioeconomic status, race*

|                                      | Class 1 | Class 2 | Class 3 | Class 4 |
|--------------------------------------|---------|---------|---------|---------|
| Probability of assignment to Class 1 | 0.836   | 0.044   | 0.007   | 0.113   |
| Probability of assignment to Class 2 | 0.146   | 0.853   | 0       | 0       |
| Probability of assignment to Class 3 | 0.057   | 0       | 0.809   | 0.134   |
| Probability of assignment to Class 4 | 0.146   | 0       | 0.03    | 0.824   |

---

*Unadjusted for Overweight Status; adjusted for age, socioeconomic status, race*

|                                      | Class 1 | Class 2 | Class 3 | Class 4 |
|--------------------------------------|---------|---------|---------|---------|
| Probability of assignment to Class 1 | 0.805   | 0.017   | 0       | 0.178   |
| Probability of assignment to Class 2 | 0.007   | 0.762   | 0.049   | 0.182   |
| Probability of assignment to Class 3 | 0       | 0.191   | 0.704   | 0.104   |
| Probability of assignment to Class 4 | 0.029   | 0.131   | 0.027   | 0.814   |

---

*Note.* Values are the posterior probabilities of latent class membership (rows) by each latent class (columns).
